# Supplementary material
Source: PubMed Central journal article supplement (PMC3384114)
Supplement: supp_amiajnl-2011-000576_Appendix_1_Expert_panels.pdf [file supp_amiajnl-2011-000576_Appendix_1_Expert_panels.pdf]

## **Appendix 1 Expert panels for each data element domain.**

### **Anxiety and Depression:**

Lisa M. Klesges (University of Memphis), Kenneth E. Freedland (Washington University), Paul B. Jacobsen (University of South Florida) and Sherri Sheinfeld Gorin (Columbia)

### **Demographics:**

Robert Kaplan (OBSSR), Maureen Boyle (OBSSR), Richard Brown (UCLA)

### **Eating Patterns:**

Marian Fitzgibbon (University of Illinois, Chicago), Susie Nanney (University of Minnesota), and Guadalupe Compean (University of Illinois, Chicago)

### **Health Literacy/Numeracy:**

Kimberly Kaphingst (Washington University), Kathleen Mazor (University of Massachusetts), and Russell Glasgow (NCI)

### **Medication-Taking Behaviour:**

Laura L. Hayman (University of Massachusetts), Felicia Hill-Briggs (Johns Hopkins), and Jackie Dunbar-Jacob (University of Pittsburgh)

### **Patient Goals:**

Geoffrey Williams (University of Rochester), Tom Bodenheimer (UCSF), Paul Estabrooks (Virginia Tech), Perry Dickinson (University of Colorado), Kathy Mazor (University of Massachusetts), Aanand Naik (Baylor), Russ Glasgow (NCI), Borsika Rabin (Kaiser Permanente) and Rick Street (Texas A&M)

### **Physical Activity:**

Paul Estabrooks (Virginia Tech), Abby King (Stanford), Brian Focht (Ohio State), Jim Sallis (San Diego State), Jim Whitehead (UCSC), and Adrian Hutber (ACSM)

### **Quality of Life:**

Robert Kaplan (OBSSR), Maureen Boyle (OBSSR)

### **Sleep Quality:**

Anna Adachi-Mejia (Dartmouth) and Glen Greenough (Dartmouth)

### **Stress:**

Margaret Chesney (UCSF), Larry Fisher (UCSF), Maureen Boyle (OBSSR)

### **Substance Abuse, Risky Drinking, and Tobacco Use:**

National Institute on Drug Abuse (NIDA) Initiative (Betty Tai, Udi Ghitza, Rob Gore-Langdon, and Robert Lindblad)
